# Supplementary material for: Discovery of potential small molecule inhibitors against β-hCG: an in silico study with in vitro validation
Source: Royal Society of Chemistry journal article supplement (doi:10.1039/d4ra08663e), 2025-01-01
Supplement: d4ra08663e1.pdf [file d4ra08663e1.pdf]

**Supplementary Table 1 : Exact sources and number of molecules from various virtual libraries**

| <b>Library</b> | <b>Filters applied</b>                                                                                                              | <b>No of molecules</b> | <b>Downloaded date (sdf format)</b> |
|----------------|-------------------------------------------------------------------------------------------------------------------------------------|------------------------|-------------------------------------|
| ZINC           | for-sale+in-trials+fda+in-man+in-cells+in-vivo+in-vitro+world                                                                       | 500                    | 13-4-2023 and 17-4-2023             |
| NCI            | Nil                                                                                                                                 | 34580                  | 24-4-2023                           |
| CHembridge     | Nil                                                                                                                                 | 1780                   | 24-4-2023                           |
| Life Chemicals | Anticancer Focused Library by 2D Similarity Search and Anticancer Targeted Library by Docking                                       | 13,600                 | 5-4-2023                            |
| LifeChemicals  | Biologically Active Compound Library and Natural Product-like Compound Libraries and PPI Focused Libraries by Ligand-based Approach | 77,332                 | 5-4-2023                            |
| ChemDB         | Nil                                                                                                                                 | 54                     | 20-4-2023                           |
| <b>Total</b>   |                                                                                                                                     | <b>127,846</b>         |                                     |

**Supplementary Table 2: Presents the top five compounds along with their SMILES format**

| Sl no | Small molecule                                        | SMILES                                                                                                     |
|-------|-------------------------------------------------------|------------------------------------------------------------------------------------------------------------|
| 1.    | Cefotetan                                             | <chem>NC(=O)C(C([O-])=O)=C1S[C@@H](S1)C(=O)N[C@]2(OC)C(=O)N([C@@H]23)C(C([O-])=O)=C(CS3)CSc4nnnn4C</chem>  |
| 2.    | F0922-0590                                            | <chem>COc(cc1)c(OC)cc1CCNC(=O)c2ccc(cc2)Cn(c3=O)c(=O)n(c(c34)cccc4)Cc5c(C)ccc(C)c5</chem>                  |
| 3.    | F0385-0029                                            | <chem>[O-]C(=O)c1cc(ccc1)NC(=O)CCCN(C(=S)S2)C(=O)/C2=C3\C(=O)N(C(=S)S3)CC(C(=O)Nc(cc4C([O-])=O)ccc4</chem> |
| 4.    | F6658-4634                                            | <chem>n1cnn(c12)c(c(C)c(n2)C)N3CCN(CC3)c4cc(=O)n(C)c(=O)[nH]4</chem>                                       |
| 5.    | 2,6,7-trihydroxy-9-(2-hydroxyphenyl)-3H-xanthen-3-one | <chem>c1cccc(O)c1-c2c(cc(O)c(c3)O)c3oc(c24)cc(=O)c(c4)O</chem>                                             |

**Supplementary Table 3: Molecules after each stage of docking from various libraries**

| <b>Sl no</b> | <b>Database</b> | <b>Number of molecules</b>                | <b>After HTVS</b>                              | <b>After SP</b>                                    | <b>After XP</b>                           | <b>After MMGBSA</b>                    |
|--------------|-----------------|-------------------------------------------|------------------------------------------------|----------------------------------------------------|-------------------------------------------|----------------------------------------|
| <b>1</b>     | ZINC            | 500                                       | 748                                            | 30                                                 | 22                                        | 22                                     |
| <b>2</b>     | LifeChemicals   | 13,600(2 sim and docking)<br>77,332(rest) | 14433(2d sim)<br>2763(docking)<br>105435(rest) | 14420<br>2D sim(898)<br>144(docking)<br>3005(rest) | 945(2D sim)<br>111(docking)<br>2001(rest) | 278(2dsim)<br>24(docking)<br>372(rest) |
| <b>3</b>     | Chembridge      | 1780                                      | 3900                                           | 160                                                | 122                                       | 33                                     |
| <b>4</b>     | NCI             | 34580                                     | 1269                                           | 838                                                | 629                                       | 226                                    |
| <b>5</b>     | ChemdB          | 54                                        | --                                             | --                                                 | 54                                        | 54                                     |

### **Supplementary Material 1 : Details of ZDOCK protocol**

The PDB ids 1HCN (for human chorionic gonadotropin) and 1PLO (for TGF $\beta$ R-II) were entered at the <https://www.rcsb.org/> website and the structures were downloaded and viewed in Pymol. For 1PLO, several models were available and only the first model was chosen to be loaded in ZDOCK, and the other models were deleted before saving under the name 1PLO.pdb. Similarly, for 1HCN the alpha chain was deleted and saved as 1HCN.pdb as crystal structure of  $\beta$ -hCG was not available. These modified pdb ids were loaded in ZDOCK with 1HCN loaded first as this was the larger file. The “Skip residue selection” option was chosen and then submitted. The results were then obtained via email after which a diagrammatic representation was made of the top 10 models of  $\beta$ -hCG with binding sites of TGF $\beta$ R-II in red with rectangles indicating the frequency of occurrence of these residues. Please find below the details of the sequences submitted to ZDOCK

#### ZDOCK complex sequence

##### TGF $\beta$ R-II

VTDNNGAVKFPQLCKFCDVRFSTCDNQKSCMSNCSITSICEKPQEVCAVWRKNDENITLET  
VCHDPKLPYHDFILEDAAAPKCMKEKKKPGETFFMCSSDECNDNIIFSEEYNTSNPD

##### $\beta$ -hCG

KEPLRPRCRPINATLAVEKEGCPVCITVNTTICAGYCPTMTRVLQGVLPALPQVVCNYRDVRF  
ESIRLPGCPRGVNPVVSYAVALSCQCALCRRSTTDCGGPKDHPLTCD

## **Supplementary Material 2 : Details of MD simulation and Ligand preparation**

### **MD simulation parameters**

Simulation time set : 100 ns

Ensemble : NPT

Temperature : 300 K

### **Ligand preparation details**

The LigPrep module in Schrödinger package is used in the comprehensive ligand preparation process that generates a high-quality library for virtual screening and docking studies. The process involves several key steps, including expanding tautomeric and ionization states, generating ring conformations, producing stereoisomers, and performing structural optimization. Tautomers arise from proton relocations within the molecule and are predicted using knowledge-based rules and the Epik module. Ionization states are generated using the Epik module, which calculates pKa values for ionizable groups and generates appropriate states within a user-defined pH range.

LigPrep also generates ring conformations by exploring low-energy ring geometries and ensuring compatibility with the active site of the receptor in docking simulations. It also produces stereoisomers for ligands with chiral centers to account for enantiomers and diastereomers, accommodating the possibility of receptor-specific enantioselectivity or diastereoselectivity.

Structural optimization is performed using the OPLS4 force field to ensure the prepared ligands are chemically accurate and energetically favorable. Filtering and refinement are also possible, with the output filtered based on physicochemical properties and user-defined parameters, such as the number of tautomers, stereoisomers, or ring conformations per compound.
